# Supplementary material for: Conversion of CO2 into renewable fuel over Pt–g-C3N4/KNbO3 composite photocatalyst
Source: Royal Society of Chemistry journal article supplement (doi:10.1039/c5ra16870h), 2015-01-01
Supplement: c5ra16870h1.pdf [file c5ra16870h1.pdf]

## Supporting Information

### **Conversion of CO<sub>2</sub> into Renewable Fuel over Pt-g-C<sub>3</sub>N<sub>4</sub>/KNbO<sub>3</sub> composite photocatalyst**

Haifeng Shi, <sup>[a, b]</sup> Chengliang Zhang, <sup>[a, b]</sup> Changping Zhou, <sup>[a, b]</sup> and Guoqing Chen, <sup>[a, b]</sup>

<sup>a</sup> School of science, Jiangnan University, Wuxi, P. R. China, 214122.

<sup>b</sup> Jiangsu Provincial Research Center of Light Industrial Optoelectronic Engineering and  
Technology, Jiangnan University, Wuxi, 214122, P. R. China

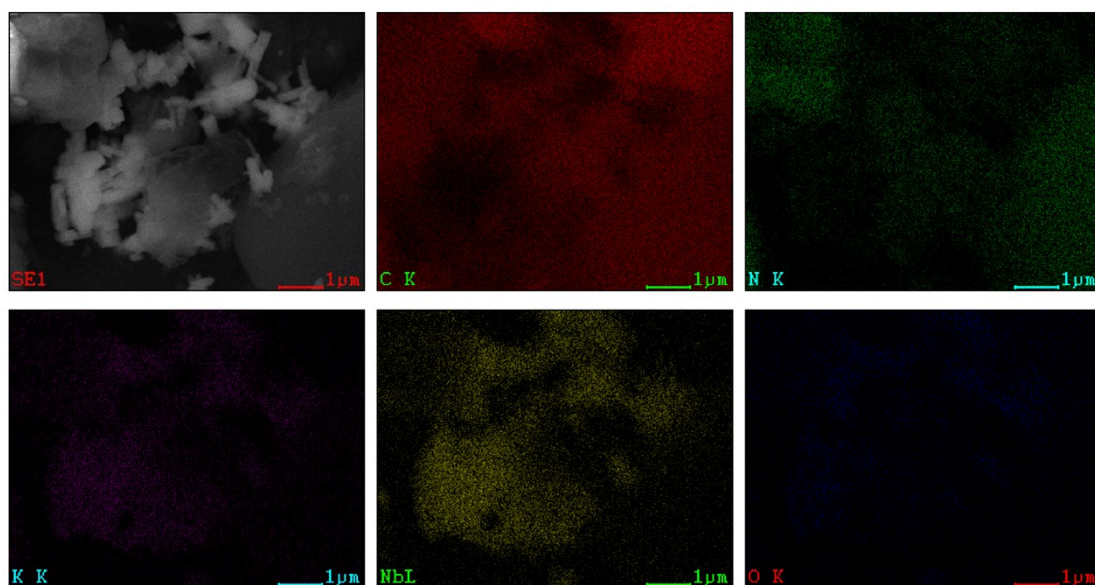

**Fig. S1** Typical SEM image and the corresponding energy dispersive spectra (EDS) mapping of g-C<sub>3</sub>N<sub>4</sub>/KNbO<sub>3</sub> composite.

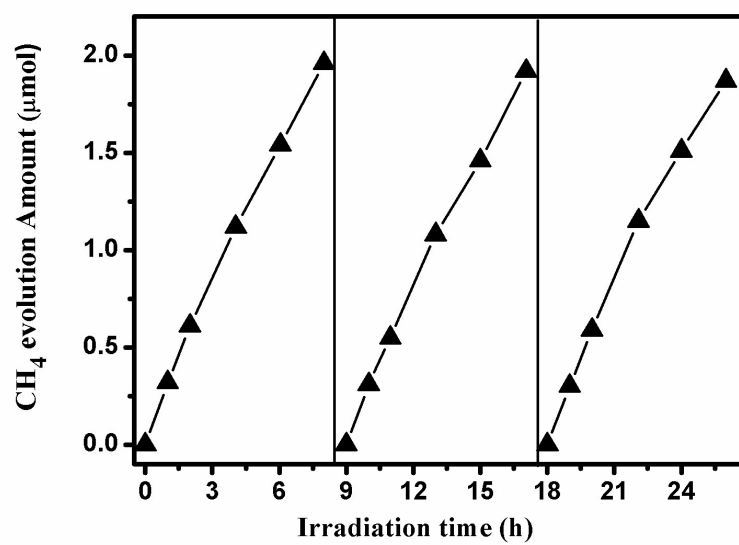

**Fig. S2** Photocatalytic CH<sub>4</sub> evolution amount over Pt loaded g-C<sub>3</sub>N<sub>4</sub>/KNbO<sub>3</sub> composite under visible light irradiation.

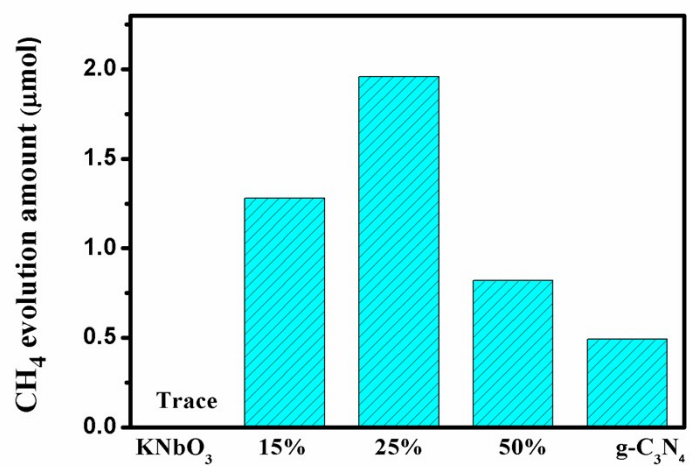

**Fig. S3** Comparison of CH<sub>4</sub> evolution amount of pt-loaded g-C<sub>3</sub>N<sub>4</sub>/KNbO<sub>3</sub> samples with the different KNbO<sub>3</sub> mass percentage after 8 hour irradiation.

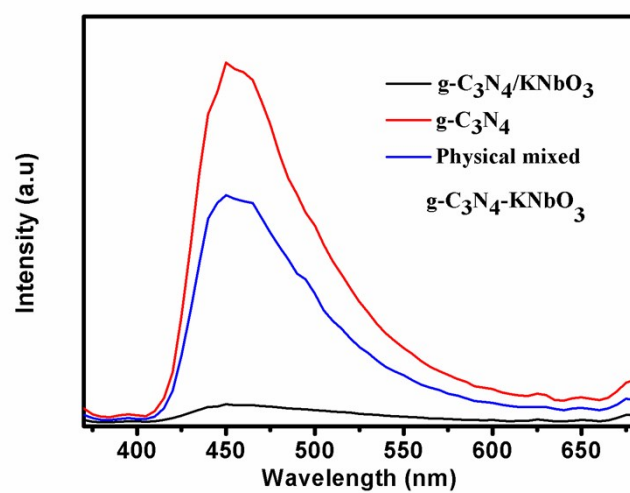

**Fig. S4** Photoluminescence (PL) spectra of  $g\text{-C}_3\text{N}_4$ , physical mixed  $g\text{-C}_3\text{N}_4\text{-KNbO}_3$ , and  $g\text{-C}_3\text{N}_4/\text{KNbO}_3$  composite.
